# Supplementary material for: Core–shell nanoheterodimers: laser-assisted deposition of single bimetallic Au@M (M = Au, Ag, Pd, Pt) nanodots on TiO2 nanoparticles
Source: Royal Society of Chemistry journal article supplement (doi:10.1039/d2ma01018f), 2022-12-14
Supplement: d2ma01018f1.pdf [file d2ma01018f1.pdf]

## Core-Shell Nanoheterodimers: Laser-Assisted Deposition of Single Bimetallic Au@M (M = Au, Ag, Pd, Pt) Nanodots on TiO<sub>2</sub> Nanoparticles

Fenghuan Zhao,<sup>a, b, †</sup> Qingguo Bai,<sup>a, b, †, &</sup> Chenghui Xia,<sup>c</sup> Junjie Hao,<sup>a, b, §</sup> Marion Gayot,<sup>d</sup> Jean-Pierre Delville,<sup>\*b</sup> Marie-Helene Delville,<sup>\*a</sup>

a Univ. Bordeaux, CNRS, Bordeaux INP, ICMCB, UMR 5026, Pessac F-33608, France.

b Univ. Bordeaux, CNRS, LOMA, UMR 5798, Talence F-33405, France.

c College of Materials Science and Engineering, Ocean University of China, QingDao 266100, China.

d Univ. Bordeaux, UMS 3626, Pessac F-33608, France

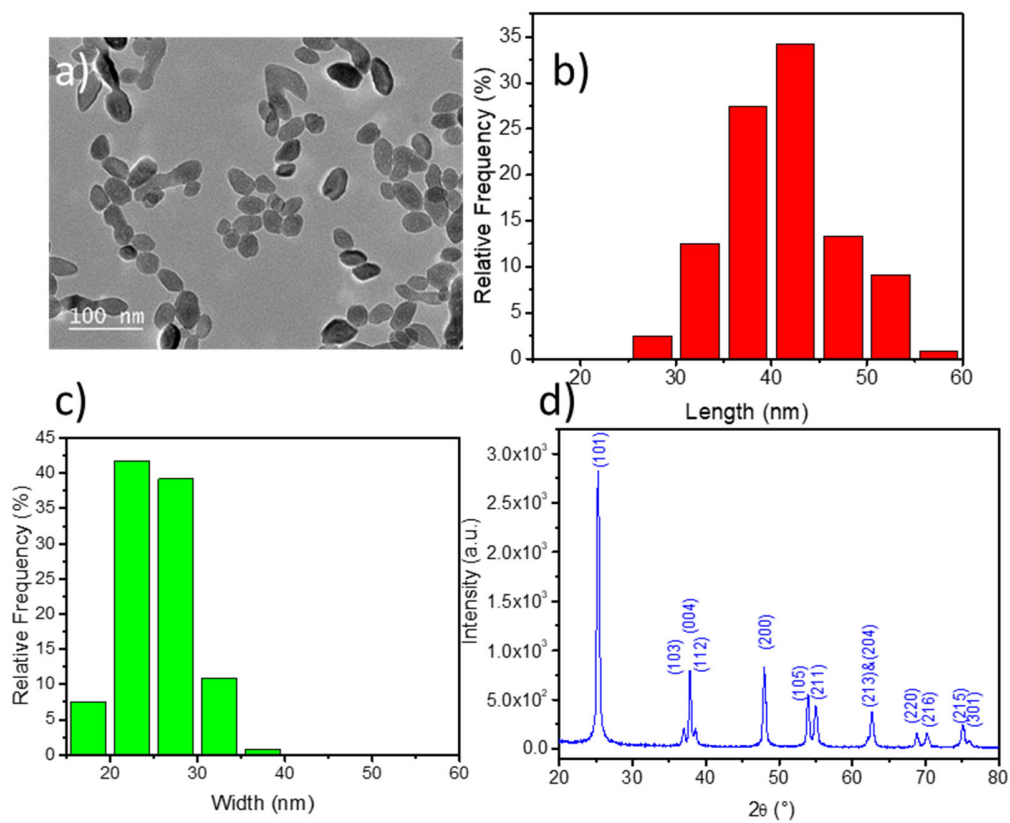

**Figure S1.** a) TEM image; b) length distribution & c) width distribution of the TiO<sub>2</sub> NPs used for photodeposition experiments; d) XRD pattern of anatase TiO<sub>2</sub> NPs (The peaks correspond to the JCPDS card no. 21-1272 of anatase TiO<sub>2</sub>).

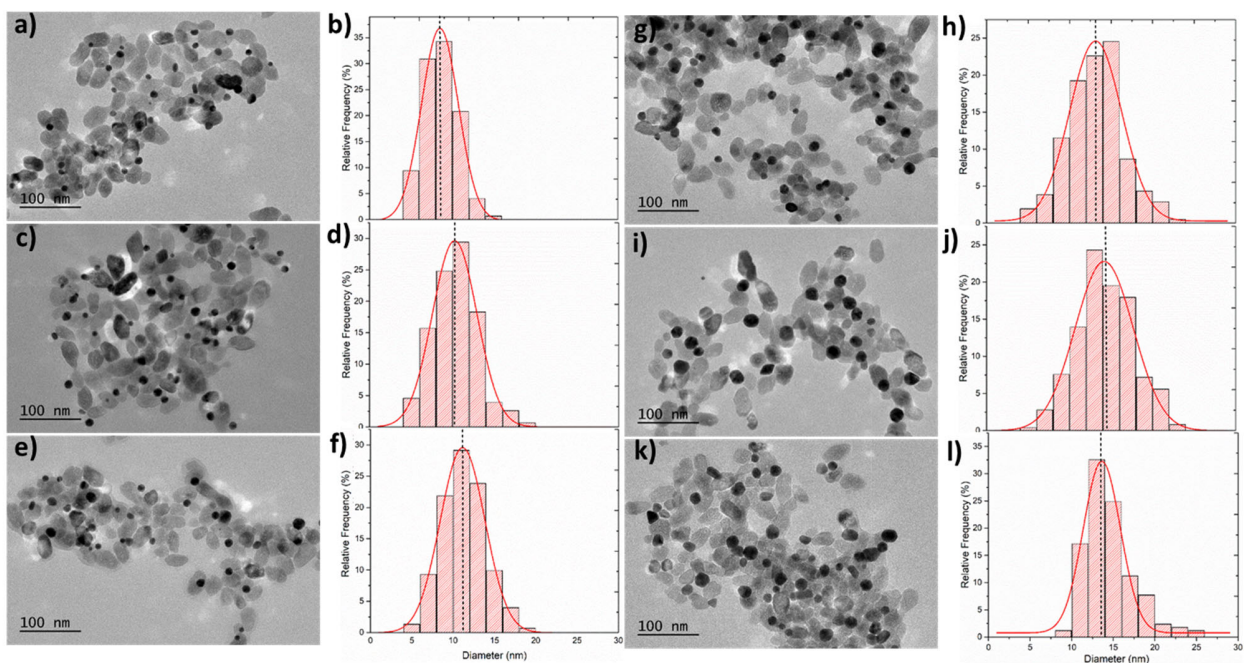

**Figure S2.** TEM images of Au-TiO<sub>2</sub> NHDs synthesized by one-step (a), and two-step deposition with different KAuCl<sub>4</sub> contents (c, e, g, i, and k) and their corresponding size distributions (b, d, f, h, j, and l). First step deposition: [TiO<sub>2</sub>] = 5.5 mM, [KAuCl<sub>4</sub>] = 0.25 mM (0.25 μmol of KAuCl<sub>4</sub>), 50 vol. % methanol as a hole scavenger, applied power of 56.1mW, and exposure time of 4 min. Second step deposition: 0.15 μmol (c), 0.25 μmol (e), 0.35 μmol (g), 0.5 μmol (i), and 0.75 μmol (k) of KAuCl<sub>4</sub> were added to the prepared Au-TiO<sub>2</sub> solution, then this solution was irradiated for another 4 min by the same laser applied power as in the first step.

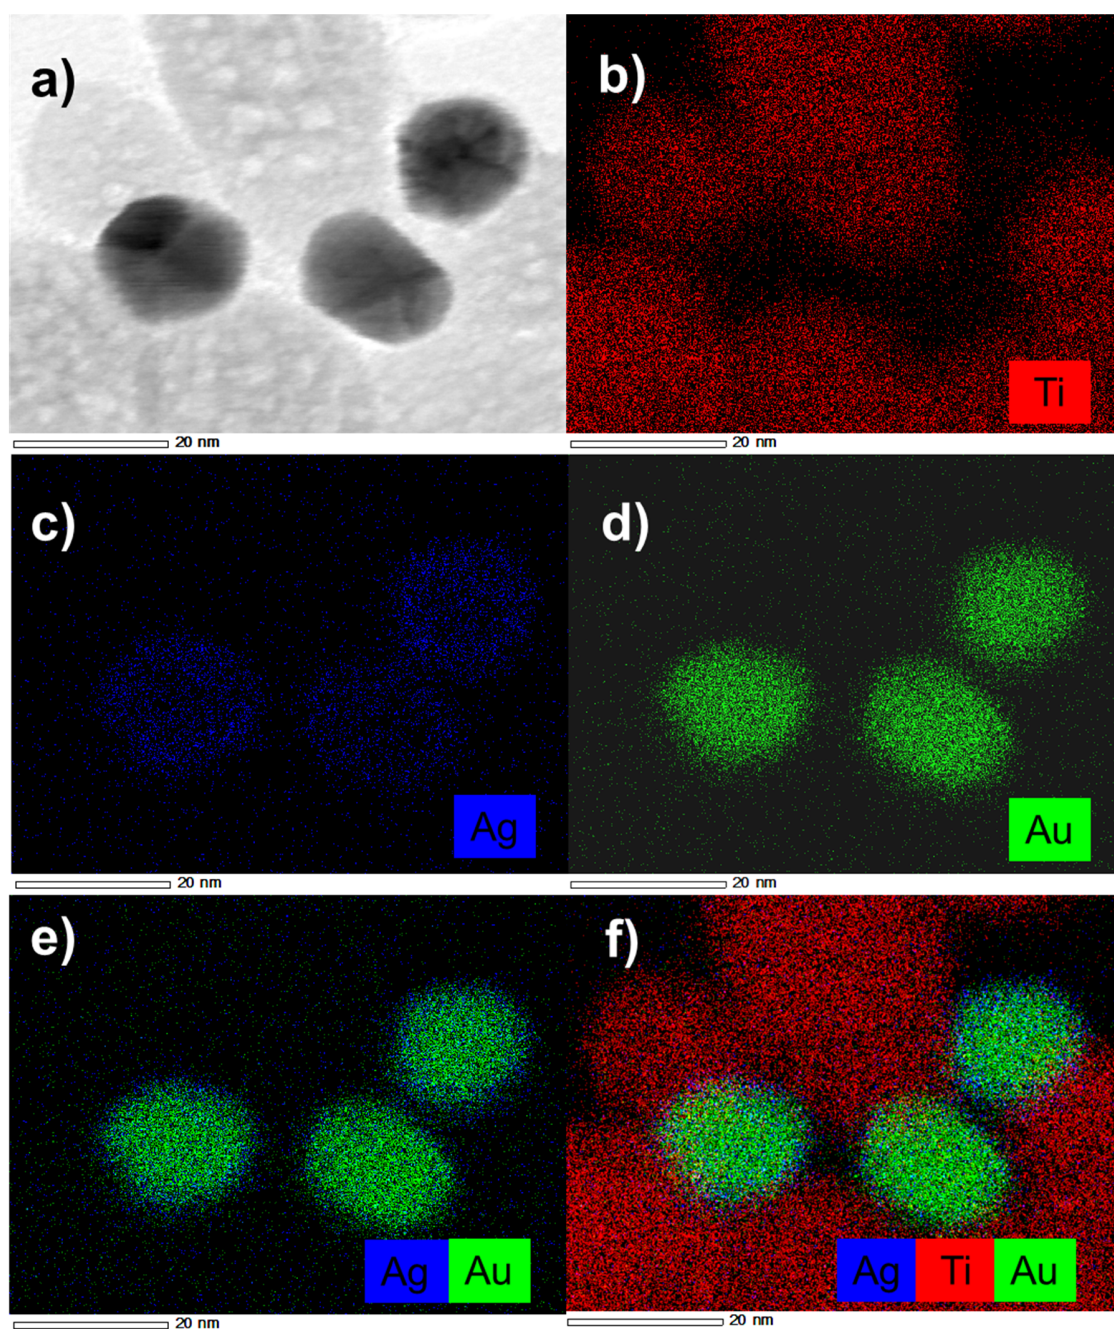

**Figure S3.** (a) STEM image of (Au@Ag)-TiO<sub>2</sub>, (b)-(f) the representative EDS mapping images and their respective overlapping.

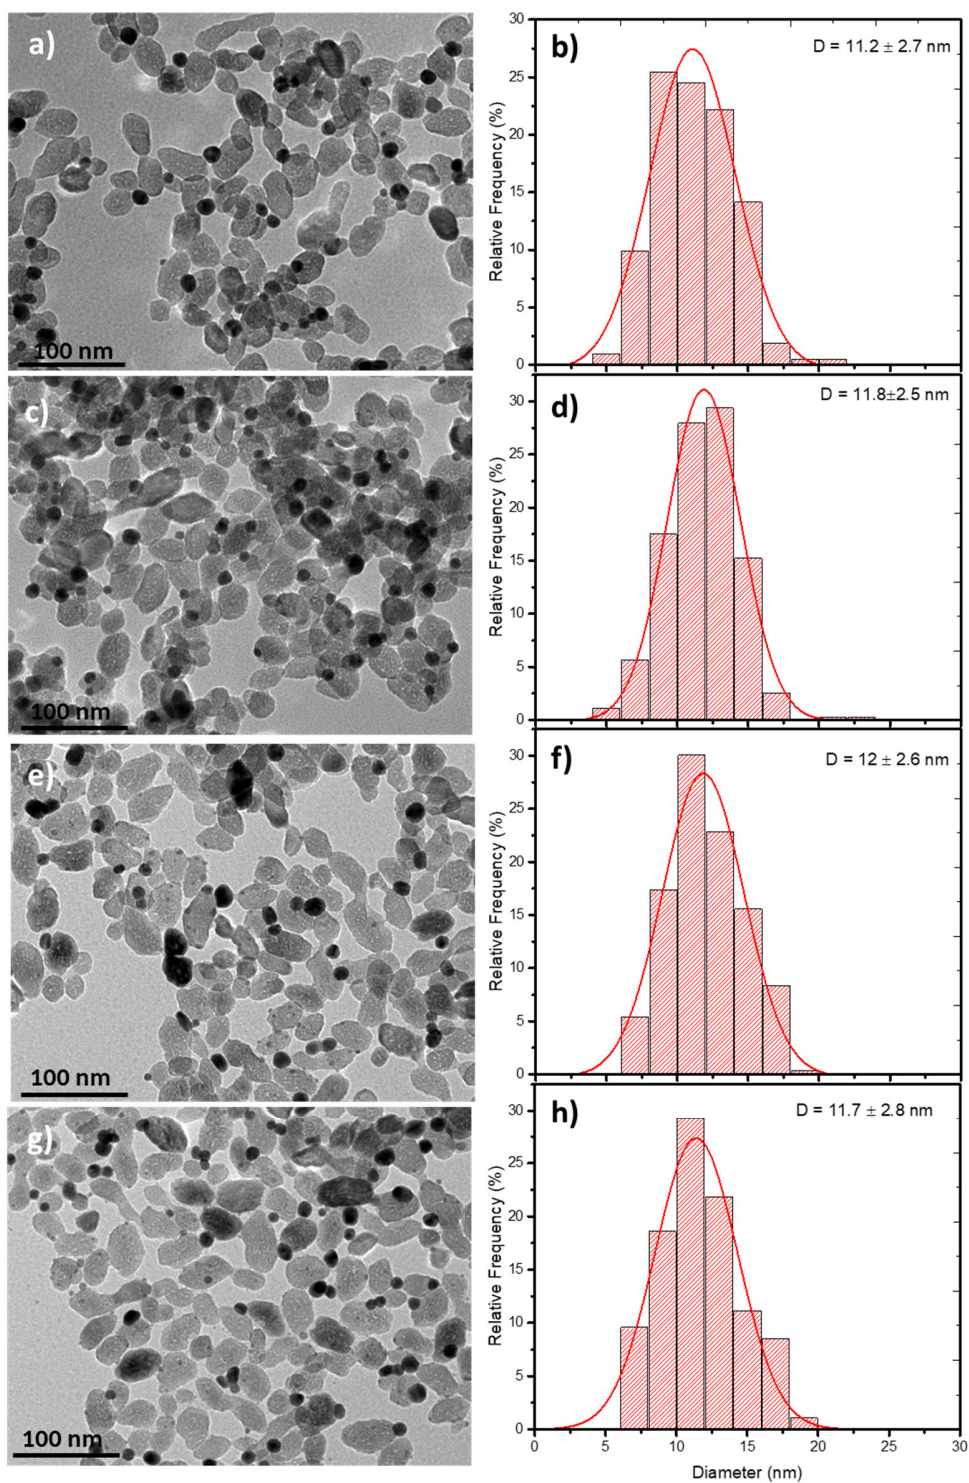

**Figure S4.** TEM images of Au@Ag-TiO<sub>2</sub> synthesized using different amounts of AgNO<sub>3</sub>, 0.25 (a), 0.50 (c), 2.00 (e), and 4.00 μmol of AgNO<sub>3</sub> (g) and their respective size distributions. The condition for preparing Au-TiO<sub>2</sub>: [TiO<sub>2</sub>] = 5.5 mM, [KAuCl<sub>4</sub>] = 0.5 mM (0.5 μmol of KAuCl<sub>4</sub>), 50 vol.% methanol as a hole scavenger, P = 56.1mW, t = 4 min. Second step deposition: t = 16 min, P = 56.1 mW.

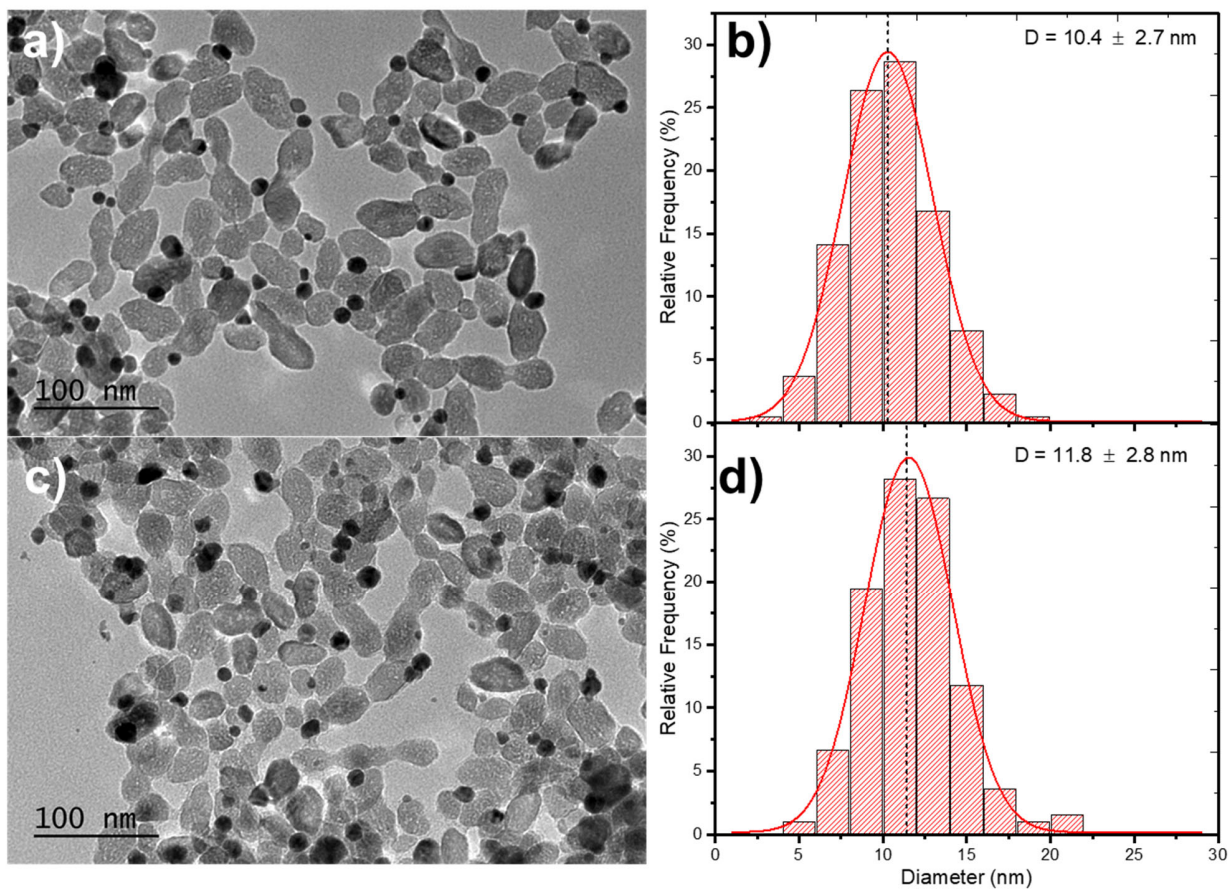

**Figure S5.** TEM images of Au-TiO<sub>2</sub> (a) and Au@Pd-TiO<sub>2</sub> (c) NPs and their corresponding size distributions (b and d). Experimental conditions: First step deposition, [TiO<sub>2</sub>] = 5.5 mM, [KAuCl<sub>4</sub>] = 0.5 mM, 50 vol.% methanol as a hole scavenger, applied power of 56.1 mW, and exposure time of 4 min. Second step deposition: 0.5 μmol of Na<sub>2</sub>PdCl<sub>4</sub> was added; irradiation for 8 min with the laser (applied power of 56.1 mW).

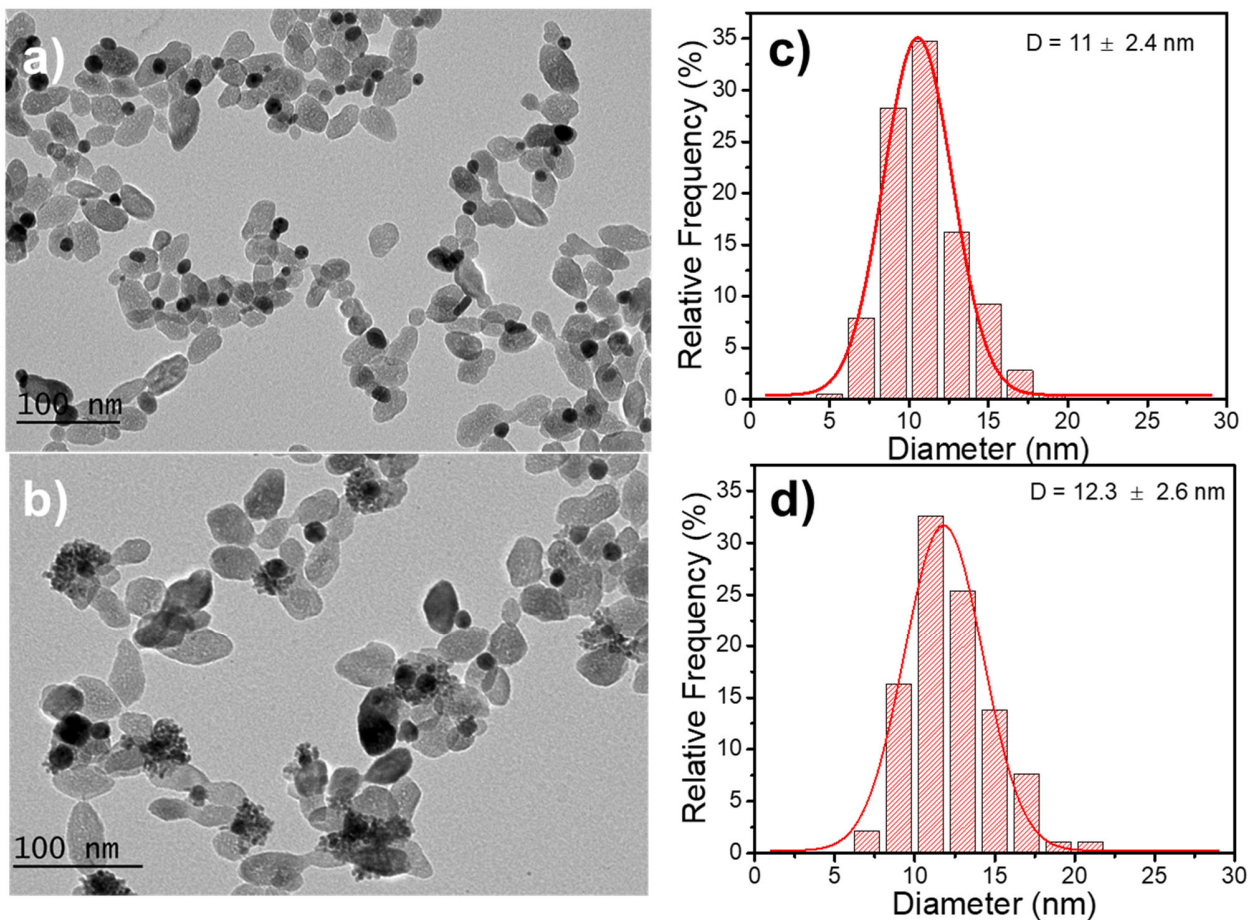

**Figure S6.** TEM images of Au@Pd-TiO<sub>2</sub> (a, b) NPs and size distributions (c). Experimental conditions: First step deposition, [TiO<sub>2</sub>] = 5.5 mM, [KAuCl<sub>4</sub>] = 0.5 mM, 50 vol.% methanol as a hole scavenger, applied power is 56.1 mW and exposure time is 4 min. Second step deposition: 1.0 μmol of PdCl<sub>2</sub> (dissolved in pH2 HCl aqueous solution) was added; then this solution was irradiated for another 4 min by the laser with an applied power of 56.1 mW.

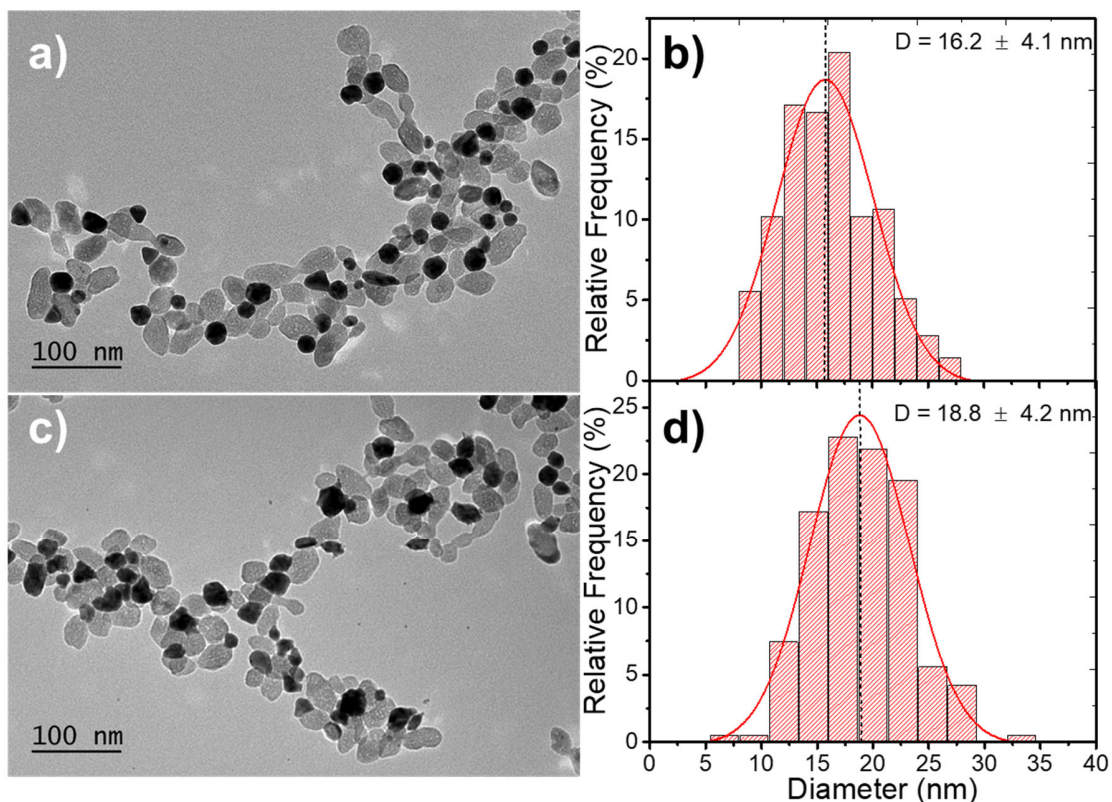

**Figure S7.** TEM images of Au-TiO<sub>2</sub> (a), and Au@Pd-TiO<sub>2</sub> (c) NPs and corresponding size distributions (b and d), h. Experimental conditions: First step deposition, [TiO<sub>2</sub>] = 1.1 mM, [KAuCl<sub>4</sub>] = 0.5 mM, 50 vol.% methanol as a hole scavenger, an applied power of 56.1 mW, and an exposure time of 4 min. Second step deposition: 0.5 μmol of PdCl<sub>2</sub> (dissolved in pH 2 HCl aqueous solution) was added; this solution was then irradiated for another 8 min by the laser with an applied power of 56.1 mW.



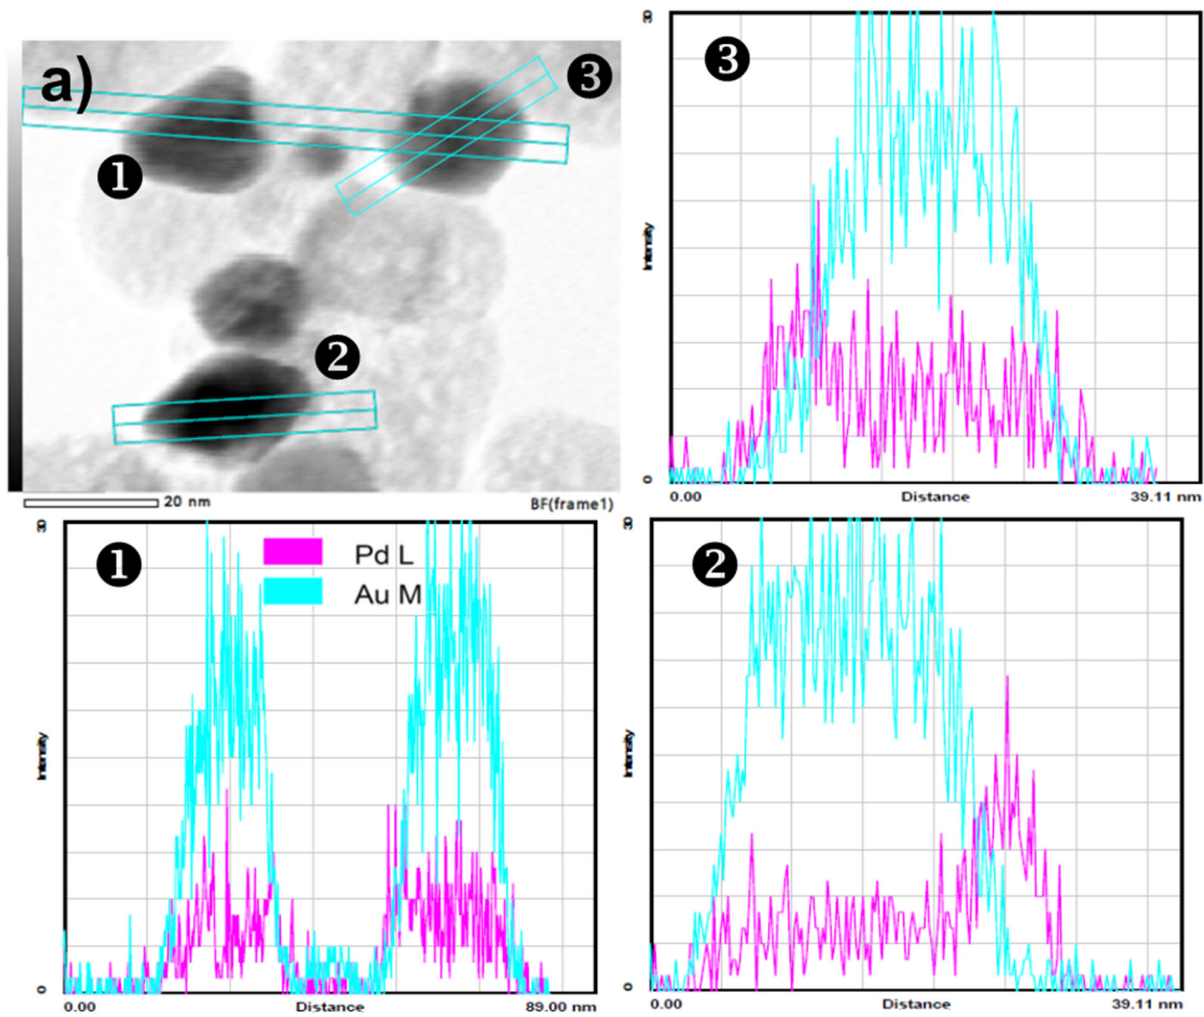

**Figure S8a.** STEM image of (Au@Pd)-TiO<sub>2</sub>, and 3 line-scan distribution profiles showing that the shell layer is not that homogeneous, and the presence of the protrusions.

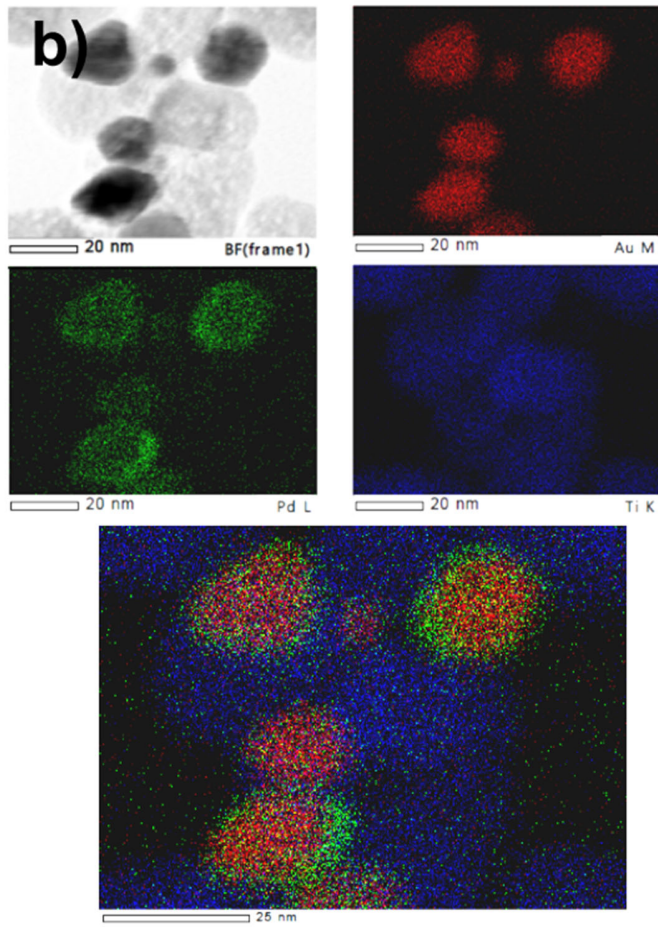

**Figure S8b.** STEM image of (Au@Pd)-TiO<sub>2</sub>, and the representative EDS mapping images and their overlapping.

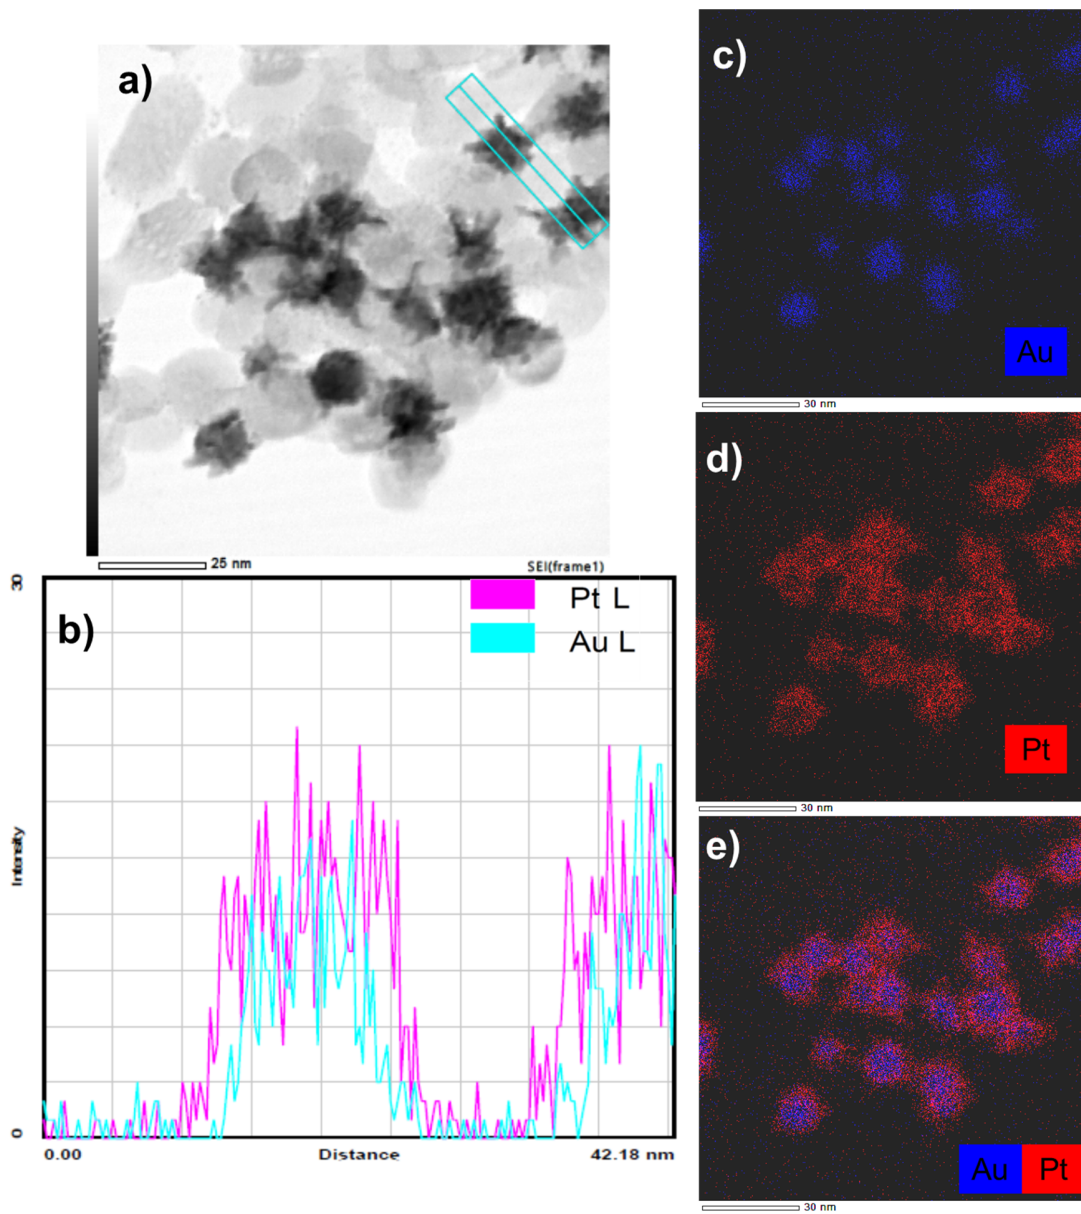

**Figure S9.** a) STEM image of (Au@Pt)-TiO<sub>2</sub> b) line-scan distribution profile showing both gold and platinum and (c)-(e) the representative EDS mapping images and overlay of the two metals.

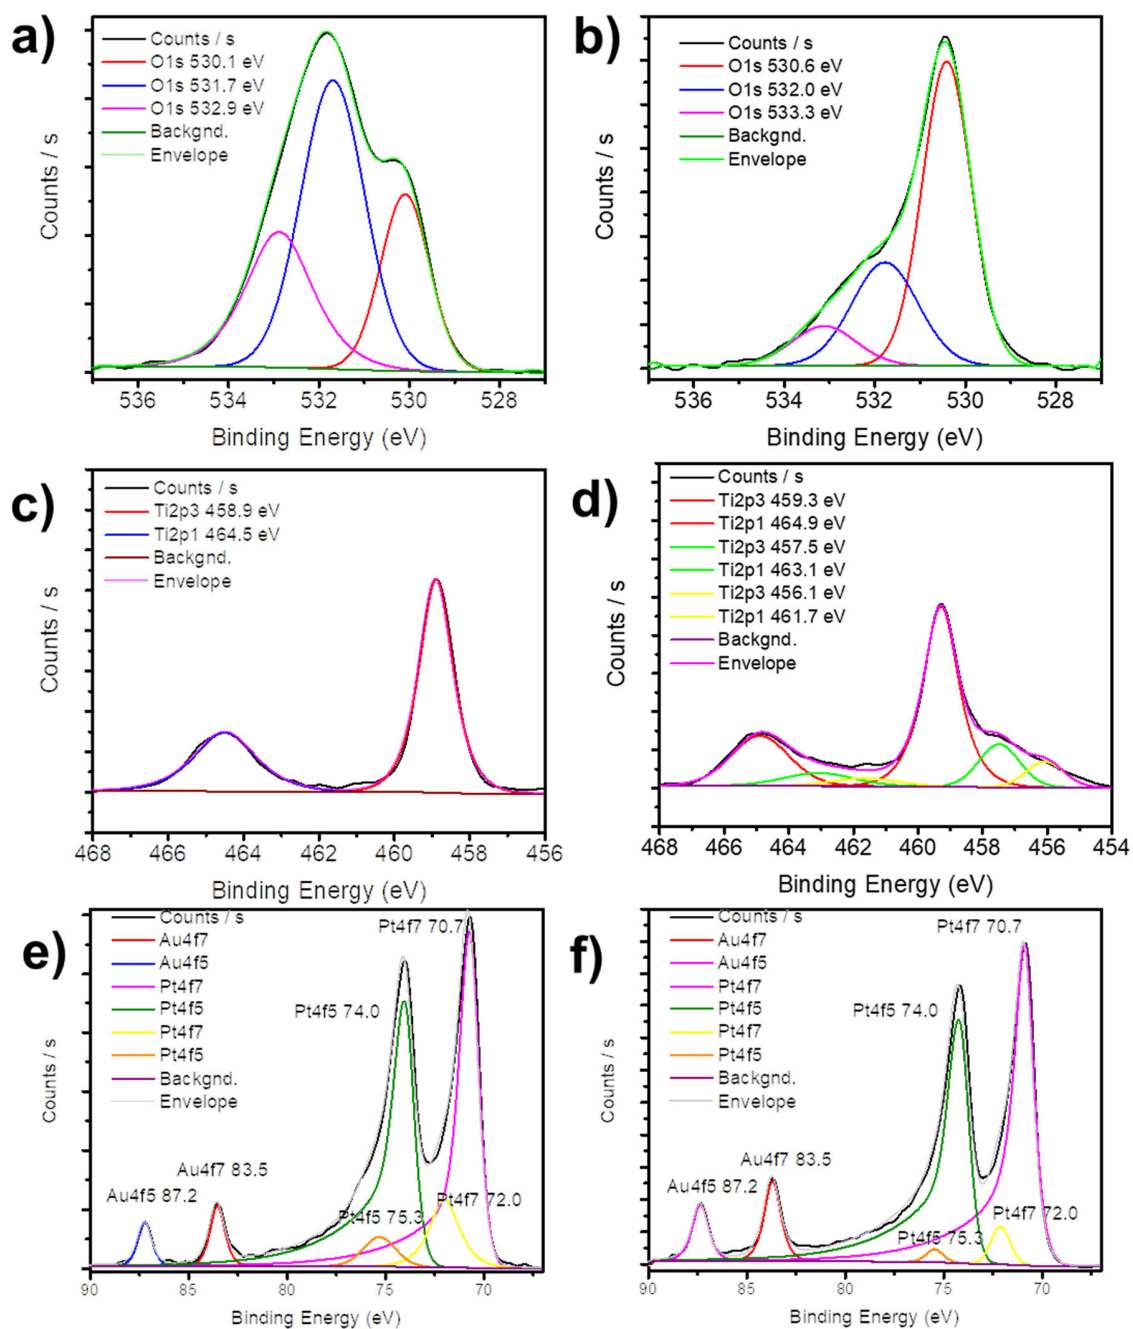

**Figure S10.** High-resolution XPS spectra of O<sub>1s</sub>, Ti<sub>2p</sub>, Au<sub>4f</sub>, and Pt<sub>4f</sub> in the Au@Pt-TiO<sub>2</sub> NHDs (a), (c), and (e) before and (b), (d), and (f) after 6 s of Ar<sup>+</sup> etching.

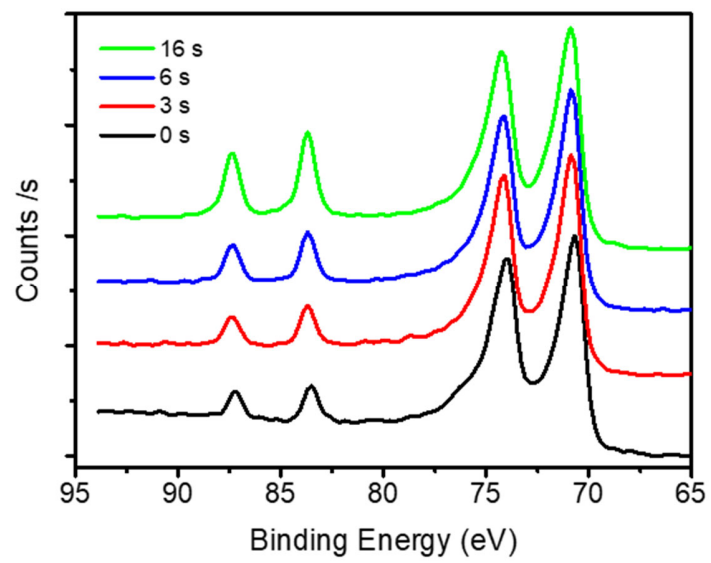

**Figure S11.** Variation of the XPS spectra of Au4f and Pt4f of the Au@Pt-TiO<sub>2</sub> NHDs with Ar<sup>+</sup> etching times.
